# Supplementary material for: An automated clinical mass spectrometric method for identification and quantification of variant and wild‐type amyloid‐β 1‐40 and 1‐42 peptides in CSF
Source: PubMed Central journal article supplement — Alzheimers Dement (Amst). 2020 Jun 30;12(1):e12036. doi: 10.1002/dad2.12036 (PMC7327131; doi:10.1002/dad2.12036), 2020-06-30
Supplement: DAD2-12-e12036-s001.pdf [file DAD2-12-e12036-s001.pdf]

# Supplementary Material

## An automated clinical mass spectrometric method for identification and quantification of variant and wild-type amyloid- $\beta$ 1-40 and 1-42 peptides in CSF

Mari L. DeMarco<sup>1,2,\*</sup>, Quyen Nguyen<sup>2</sup>, Alice Fok<sup>3</sup>, Ging-Yuek Robin Hsiung<sup>3</sup> and J. Grace van der Gugten<sup>1</sup>

<sup>1</sup>Department of Pathology and Laboratory Medicine, St Paul's Hospital, Providence Health Care, Vancouver, Canada, <sup>2</sup>Department of Pathology and Laboratory Medicine, University of British Columbia, Vancouver, Canada, <sup>3</sup>Division of Neurology, University of British Columbia, Vancouver, Canada \*Corresponding author: mdmrco@mail.ubc.ca

### Table of Contents

|          |                                                                                                                                                                                                                            |          |
|----------|----------------------------------------------------------------------------------------------------------------------------------------------------------------------------------------------------------------------------|----------|
| <b>1</b> | <b>Material Sources and Equipment.....</b>                                                                                                                                                                                 | <b>2</b> |
| <b>2</b> | <b>Methods.....</b>                                                                                                                                                                                                        | <b>2</b> |
| 2.1      | <i>Preparation of A<math>\beta</math> calibrators</i> .....                                                                                                                                                                | 2        |
|          | <b>Supplemental Table 1.</b> Spiking solutions preparation scheme. ....                                                                                                                                                    | 3        |
|          | <b>Supplemental Table 2.</b> Calibrator preparation .....                                                                                                                                                                  | 3        |
| 2.2      | <i>Internal Standards (IS)</i> .....                                                                                                                                                                                       | 3        |
| 2.3      | <i>Sample preparation</i> .....                                                                                                                                                                                            | 4        |
| 2.4      | <i>Solid-phase extraction</i> .....                                                                                                                                                                                        | 4        |
| 2.5      | <i>HPLC-MS/MS</i> .....                                                                                                                                                                                                    | 4        |
|          | <b>Supplemental Table 3.</b> MRM Transitions for A $\beta$ peptides.....                                                                                                                                                   | 5        |
| 2.6      | <i>Figures of Merit</i> .....                                                                                                                                                                                              | 5        |
|          | <b>Supplemental Table 4.</b> Linearity results for A $\beta$ 42.....                                                                                                                                                       | 5        |
|          | <b>Supplemental Table 5.</b> Linearity results for A $\beta$ 40.....                                                                                                                                                       | 5        |
|          | <b>Supplemental Figure 1.</b> Linear regression analysis for the HPLC-MS/MS observed versus expected (A) A $\beta$ 42 and (B) A $\beta$ 40 concentrations.....                                                             | 6        |
|          | <b>Supplemental Table 6.</b> Precision of manual versus automated sample preparation .....                                                                                                                                 | 6        |
|          | <b>Supplemental Figure 3.</b> Representative chromatograms of A) A $\beta$ 42 MRM-1, B) <sup>15</sup> N- A $\beta$ 42, C) A $\beta$ 40 MRM-1, D) <sup>15</sup> N- A $\beta$ 40, all from A $\beta$ 100 ng/L solutions..... | 7        |
| 2.7      | <i>APP Variants</i> .....                                                                                                                                                                                                  | 8        |
|          | <b>Supplemental Table 7.</b> Published variants in A $\beta$ 42 region.....                                                                                                                                                | 8        |
|          | <b>Supplemental Table 8.</b> MRM transitions of wt-A $\beta$ peptides and var-A $\beta$ peptides .....                                                                                                                     | 10       |

## 1 Material Sources and Equipment

The following materials were obtained from the indicated commercial sources: Beta-Amyloid (1-42) (A $\beta$ 42), Ultra Pure, TFA [A-1002-2; rPeptide], Beta-Amyloid (1-40) (A $\beta$ 40), Ultra Pure, TFA [A-1001-2; rPeptide], <sup>15</sup>N Beta-Amyloid (1-42) (A $\beta$ 42), Uniformly labeled [A-1102-2; rPeptide], <sup>15</sup>N Beta-Amyloid (1-40) (A $\beta$ 40), Uniformly labeled [A-1101-2; rPeptide], E22G variant A $\beta$ 40 [H-6694.0500; Bachem], E22Q variant A $\beta$ 40 [H-6696.0500; Bachem], D23N variant A $\beta$ 40 [H-7332.0500; Bachem], D7N variant A $\beta$ 40 [H-7334.0500; Bachem], H6R variant A $\beta$ 40 [H-7336.0500; Bachem], L34V variant A $\beta$ 40 [H-7414.0500; Bachem], E22 $\Delta$  variant A $\beta$ 40 [H-7474.0500; Bachem], E22K variant A $\beta$ 40 [H-6698.0500; Bachem], A21G variant A $\beta$ 40 [H-6702.0500; Bachem], bovine serum albumin (BSA) [2930-100 GM; Fisher EMD Millipore Brand], guanidine hydrochloride (GdnHCl) [G-4506-1006; Sigma-Aldrich], INNOTEST hTau Ag (RUO) [81579; Fujirebio], INNOTEST  $\beta$ -Amyloid (1-42) (RUO) [81583; Fujirebio], 15 mL conical sterile polypropylene centrifuge tubes [12-565-269; Fisher Scientific], Axygen MAXYMum Recovery 1.7 mL Snaplock microcentrifuge tubes [MCT-175-L-C], Axygen MAXYMum Recovery 0.6 mL Snaplock microcentrifuge tubes [MCT-060-L-C], NUNC pre-slit capmats [12-565-570; Fisher Scientific], 0.5 mL AntiBIND 96WP [02 911 700; Fisher Scientific], MCX  $\mu$ Elution plate [186001830BA; Waters Oasis], eppendorf ThermoMixer [CA11028-280], 2.6  $\mu$ m EVO C18 100 x 3.0 mm [00D-4725-Y0; Phenomenex Kinetex], Phenomenex KrudKatcher Classic HPLC In-Line Filter [AFO-5727, Phenomenex], SCIEX 5500 QTRAP mass spectrometer, Shimadzu HPLC, and Hamilton STARlet.

## 2 Methods

### 2.1 Preparation of A $\beta$ calibrators

*Stock Peptide Solutions.* The 1 mg/vial or 0.5 mg/vial of lyophilized A $\beta$  peptides from rPeptide were stored at -70 °C until use. Lyophilized stocks were brought to room temperature for 10 min and then dissolved in DMSO in the original vial to produce 0.5 mg/mL stock solutions. After sonication (2 min) and inversion, 100  $\mu$ L aliquots were made in MAXYMum Recovery tubes, capped, sealed with Parafilm and stored immediately at -70 °C.

*Intermediate Peptide Solutions.* A 1/10 dilution was performed on the 0.5 mg/mL stock solutions with DMSO producing an intermediate 50  $\mu$ g/mL working solution. The solution was aliquoted in 100  $\mu$ L aliquots in MAXYMum Recovery tubes, sealed with Parafilm and stored immediately at -70 °C.

*Working Peptide Solution.* The 50  $\mu$ g/mL intermediate peptide solutions were diluted 1/10 in 30% ACN in DI water + 1% NH<sub>4</sub>OH to make 5000 ng/mL, 500 ng/mL and 50 ng/mL solutions.

*Spiking Peptide Solutions.* The spiking solutions were prepared as follows in Supplementary Table 1 using the stock and working peptide solutions.

**Supplemental Table 1.** Spiking solutions preparation scheme.

| Spiking soln ID | A $\beta$ 42 soln (ng/L) | Volume of A $\beta$ 42 soln ( $\mu$ L) | A $\beta$ 40 soln (ng/L) | Volume of A $\beta$ 40 soln ( $\mu$ L) | 30% ACN in DI water + 1% NH <sub>4</sub> OH (mL) | A $\beta$ 42 in spiking soln (ng/L) | A $\beta$ 40 in spiking soln (ng/L) |
|-----------------|--------------------------|----------------------------------------|--------------------------|----------------------------------------|--------------------------------------------------|-------------------------------------|-------------------------------------|
| 1               | 5.0E+04                  | 100                                    | 5.0E+04                  | 100                                    | 0.800                                            | 5.0E+03                             | 5.0E+03                             |
| 2               | 5.0E+05                  | 20                                     | 5.0E+05                  | 100                                    | 0.880                                            | 1.0E+04                             | 5.0E+04                             |
| 3               | 5.0E+05                  | 50                                     | 5.0E+06                  | 50                                     | 0.900                                            | 2.5E+04                             | 2.5E+05                             |
| 4               | 5.0E+05                  | 75                                     | 5.0E+06                  | 100                                    | 0.825                                            | 3.8E+04                             | 5.0E+05                             |
| 5               | 5.0E+05                  | 100                                    | 5.0E+07                  | 15                                     | 0.885                                            | 5.0E+04                             | 7.5E+05                             |
| 6               | 5.0E+06                  | 30                                     | 5.0E+07                  | 20                                     | 0.950                                            | 1.5E+05                             | 1.0E+06                             |

Calibrators were used immediately after preparation for each experimental run. Calibrators were prepared in artificial CSF (1 mg/mL BSA in phosphate-buffer saline [PBS]) to create the 6-point calibrators (Supplemental Table 2).

**Supplemental Table 2.** Calibrator preparation and resulting calibrator concentrations.

| Calibrator | A $\beta$ Spiking Solution ID | Standard solution ( $\mu$ L) | Artificial CSF ( $\mu$ L) | Final A $\beta$ 42 concentration (ng/L) | Final A $\beta$ 40 concentration (ng/L) |
|------------|-------------------------------|------------------------------|---------------------------|-----------------------------------------|-----------------------------------------|
| n/a        | n/a                           | n/a                          | 500                       | -                                       | -                                       |
| S1         | 1                             | 10                           | 490                       | 100                                     | 100                                     |
| S2         | 2                             | 10                           | 490                       | 200                                     | 1,000                                   |
| S3         | 3                             | 10                           | 490                       | 500                                     | 5,000                                   |
| S4         | 4                             | 10                           | 490                       | 750                                     | 10,000                                  |
| S5         | 5                             | 10                           | 490                       | 1,000                                   | 15,000                                  |
| S6         | 6                             | 10                           | 490                       | 3,000                                   | 20,000                                  |

## 2.2 Internal Standards (IS)

*Stock IS Solutions.* One milliliter of 1% NH<sub>4</sub>OH was added to the lyophilized <sup>15</sup>N-uniformly labelled A $\beta$ 42 and <sup>15</sup>N-uniformly labelled A $\beta$ 40 vials to produce 1 mg/mL concentrated solutions. The solution was sonicated for 1 minute, aliquoted in 100  $\mu$ L aliquots in MAXYMum Recovery tubes, sealed with Parafilm and stored immediately at -70 °C.

*Working IS Solutions.* A 1/10 dilution was performed in 1% NH<sub>4</sub>OH in 30:70 ACN: DI water to make a 100  $\mu$ g/mL solution. The solution was aliquoted to labelled tubes and stored immediately at -70 °C. The <sup>15</sup>N-A $\beta$ 42 was diluted by 1/10 further in 1% NH<sub>4</sub>OH in 30:70 ACN: DI water to

make a 10 µg/mL solution. This solution was aliquoted in 100 µL aliquots and stored immediately at -70 °C.

*IS Mix.* One hundred microliters of the 100 µg/mL <sup>15</sup>N-Aβ40 and 100 µL of the 10 µg/mL <sup>15</sup>N-Aβ42 were added into 800 µL of 1% NH<sub>4</sub>OH in 30:70 ACN: DI water producing a mixed solution of 10 µg/mL <sup>15</sup>N-Aβ40 and 1 µg/mL <sup>15</sup>N-Aβ42. The solution was aliquoted in 50 µL aliquots and stored immediately at -70 °C.

*IS in 5 M GdnHCl.* Ten microliters of the IS mix was added to 10 mL of 5 M GdnHCl and vortexed to mix. This solution was prepared fresh on the day of analysis.

### 2.3 Sample preparation

Two hundred microliters each CSF standard, human CSF sample or QC was aliquoted to a 2 mL AntiBIND 96 well plate. Two hundred microliters of the IS mix in 5 M GdnHCl was then added to each sample. The 96 well plate was sealed and placed on the ThermoMixer to mix at 1000 rpm for 40 minutes at room temperature. Following denaturation, 200 µL of 4% H<sub>3</sub>PO<sub>4</sub> was added to each sample followed by SPE extraction of the Aβ peptides.

### 2.4 Solid-phase extraction

Following denaturation, Aβ peptides were extracted from CSF samples by SPE. The MCX µElution plate was conditioned with 200 µL of 100% MeOH, followed by 200 µL of 4% H<sub>3</sub>PO<sub>4</sub> under ~200 mbar vacuum. Six hundred microliters of the sample was then added to the plate under ~200 mbar vacuum. The column was washed twice with 200 µL of 4% H<sub>3</sub>PO<sub>4</sub>. Three elution steps were then performed with: 25 µL of 75:15:10 (v:v:v) ACN: H<sub>2</sub>O: NH<sub>4</sub>OH, followed by 50 µL of 75:15:10 (v:v:v) ACN: H<sub>2</sub>O: NH<sub>4</sub>OH, followed 75 µL of deionized water. Eluted samples were collected in 500 µL AntiBIND 96 well plate.

### 2.5 HPLC-MS/MS

For each sample, 40 µL of the eluate was injected onto a reverse phase column. Mobile phase A was 0.3% NH<sub>4</sub>OH in water (prepared fresh daily) and mobile phase B was 25:75 IPA:ACN. The gradient was: 1.00 min = 15% B; 5.00 min = 55% B; 5.50 min = 95% B; 8.90 min = 95% B; 9.00 min = 15% B. Total run time was 11.5 minutes.

The SCIEX 5500 QTRAP mass spectrometer was operated in ESI+ mode, with curtain gas set to 35 V, collision gas set to high, ionspray voltage set to 4250 V, source temperature set to 700 °C, gas 1 and gas 2 both set to 50. A dwell time of 45 ms, a declustering potential of 100 V, and an entrance potential of 10 V was used for all MRM transitions. Data was acquired for each of the MRM transitions outlined in Supplemental Table 3.

**Supplemental Table 3.** MRM Transitions for A $\beta$  peptides.

| Analyte                      | Q1 (m/z) | Q3 (m/z) | Collision Energy (V) | Collision Cell Exit Potential (V) |
|------------------------------|----------|----------|----------------------|-----------------------------------|
| <sup>15</sup> N-A $\beta$ 42 | 1143.0   | 1092.1   | 35                   | 24                                |
| A $\beta$ 42 1               | 1129.2   | 1107.1   | 35                   | 24                                |
| A $\beta$ 42 2               | 1129.2   | 1078.6   | 32                   | 24                                |
| A $\beta$ 42 3               | 1129.2   | 1053.8   | 39                   | 24                                |
| <sup>15</sup> N-A $\beta$ 40 | 1096.0   | 1066.9   | 35                   | 22                                |
| A $\beta$ 40 1               | 1083.4   | 1054.1   | 33                   | 23                                |
| A $\beta$ 40 2               | 1083.4   | 1029.1   | 37                   | 22                                |
| A $\beta$ 40 3               | 1083.4   | 1000.8   | 36                   | 22                                |

### 2.6 Figures of Merit

Linearity of A $\beta$ 42 and A $\beta$ 40 was assessed in a mixing study using human CSF pools (see manuscript for details).

**Supplemental Table 4.** Linearity results for A $\beta$ 42.

| Human CSF low: high pool ratios | Observed average of triplicate analyses (ng/L) | Expected (ng/L) | Recovery (%) |
|---------------------------------|------------------------------------------------|-----------------|--------------|
| 100:0                           | 220                                            | N/A             | N/A          |
| 90:10                           | 502                                            | 537             | 93.5         |
| 80:20                           | 872                                            | 853             | 102.1        |
| 50:50                           | 1750                                           | 1803            | 97.0         |
| 20:80                           | 2687                                           | 2753            | 97.6         |
| 0:100                           | 3387                                           | N/A             | N/A          |

**Supplemental Table 5.** Linearity results for A $\beta$ 40.

| Human CSF (low: high pool ratios) | Observed average of triplicate analyses (ng/L) | Expected (ng/L) | Recovery (%) |
|-----------------------------------|------------------------------------------------|-----------------|--------------|
| 100:0                             | 1067                                           | N/A             | N/A          |
| 90:10                             | 3303                                           | 3367            | 98.1         |
| 80:20                             | 5503                                           | 5667            | 97.1         |
| 50:50                             | 12400                                          | 12567           | 98.7         |
| 20:80                             | 18833                                          | 19467           | 96.7         |
| 0:100                             | 24067                                          | N/A             | N/A          |

A)

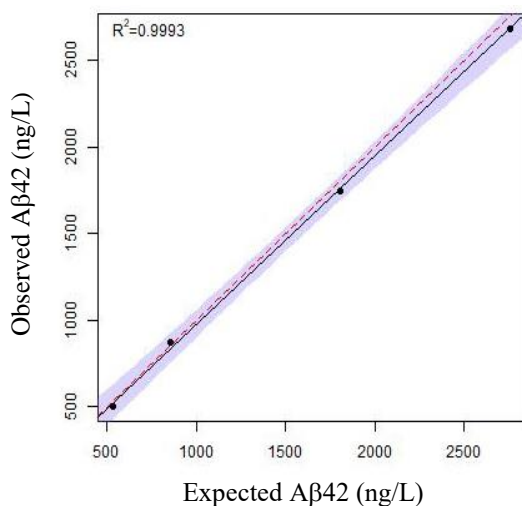

B)

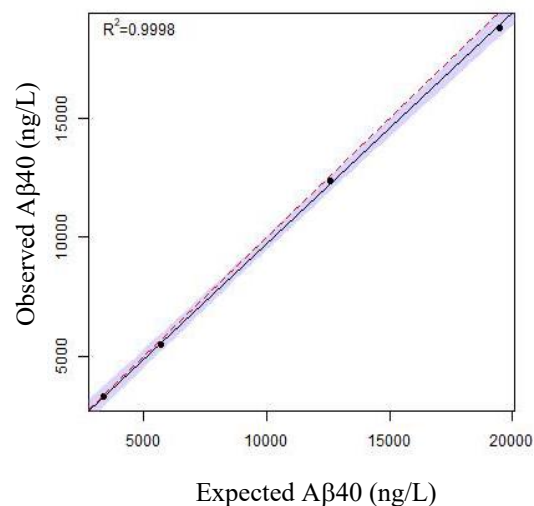

**Supplemental Figure 1.** Linear regression analysis for the observed HPLC-MS/MS results versus the expected (A) A $\beta$ 42 and (B) A $\beta$ 40 concentrations.

**Supplemental Table 6.** Precision of manual versus automated sample preparation for HPLC-MS/MS analysis.

| Sample preparation | QC pool      | Nominal concentration (ng/L) | Within-run CV (%) | Between-run CV (%) | Total CV (%) |      |
|--------------------|--------------|------------------------------|-------------------|--------------------|--------------|------|
| <b>Manual</b>      | A $\beta$ 40 | Low (n = 19)                 | 2020              | 4.60               | 6.20         | 7.70 |
|                    |              | Medium (n = 20)              | 3900              | 6.60               | 2.70         | 7.10 |
|                    |              | High (n = 19)                | 10100             | 4.70               | 4.50         | 6.50 |
|                    | A $\beta$ 42 | Low (n = 19)                 | 273               | 9.00               | 13.0         | 16.0 |
|                    |              | Medium (n = 19)              | 522               | 9.00               | 0.0          | 8.00 |
|                    |              | High (n = 19)                | 1290              | 7.00               | 6.00         | 9.00 |
| <b>Automated</b>   | A $\beta$ 40 | Low (n = 24)                 | 840               | 6.00               | 3.30         | 7.70 |
|                    |              | Medium (n = 25)              | 3500              | 8.50               | 6.80         | 10.9 |
|                    |              | High (n = 25)                | 10000             | 9.50               | 7.80         | 12.3 |
|                    | A $\beta$ 42 | Low (n = 24)                 | 113               | 10.0               | 0.0          | 9.00 |
|                    |              | Medium (n = 25)              | 452               | 12.0               | 15.0         | 19.0 |
|                    |              | High (n = 24)                | 1270              | 8.00               | 6.00         | 10.0 |

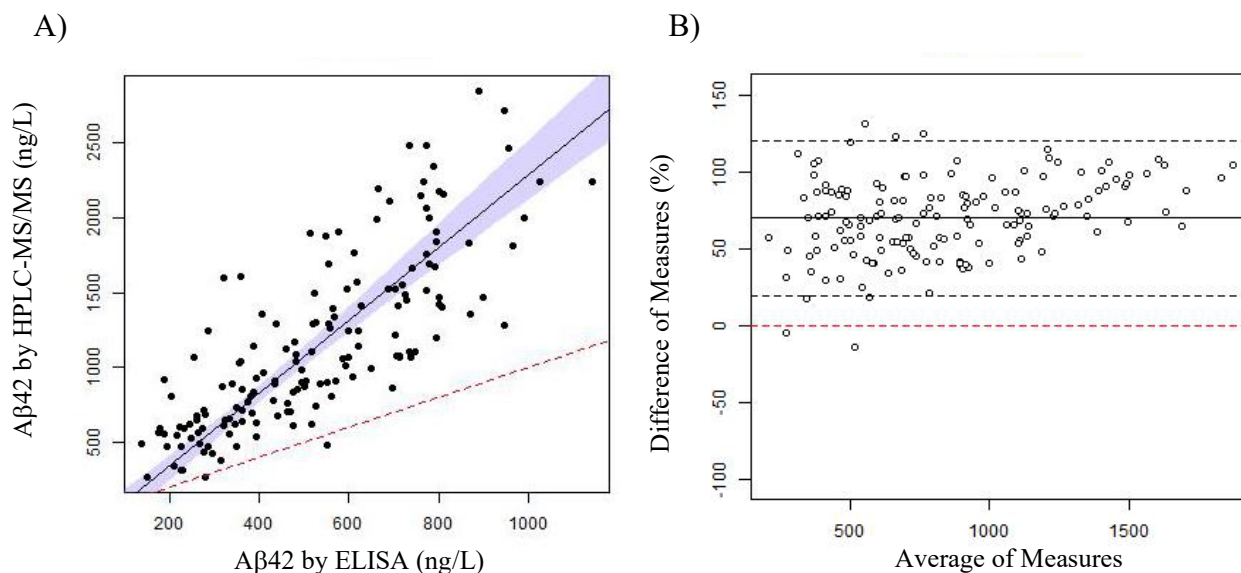

**Supplementary Figure 2.** Method comparison of the HPLC-MS/MS method and the INNOTEST ELISA (n =155) including (A) linear regression analysis:  $Y_{\text{HPLC-MS/MS}} = 2.64 \times X_{\text{ELISA}} - 247.4$ ,  $R_2 = 0.63$ ,  $R_2 = 0.63$  (shaded region represents the 95% CI of the slope, red dashed line is the line of identity) and (B) the difference plot (black dashed lines represent the 95% CI of the mean difference).

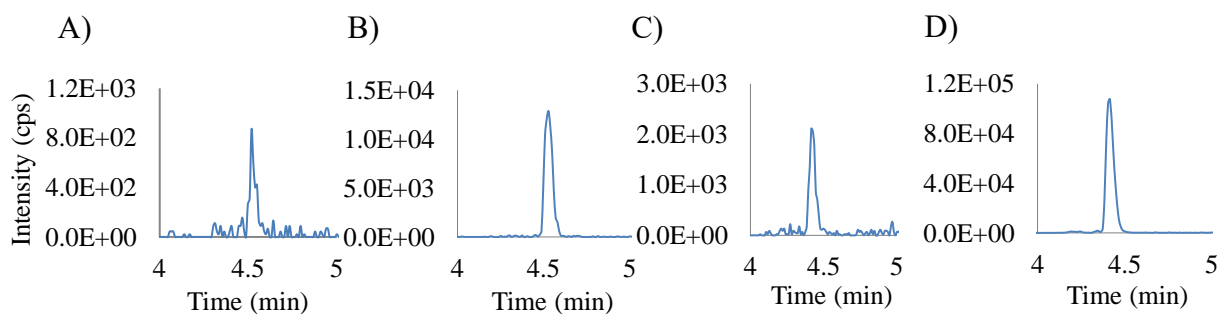

**Supplemental Figure 3.** Representative chromatograms of A) Aβ42 MRM-1, B)  $^{15}\text{N}$ - Aβ42, C) Aβ40 MRM-1, D)  $^{15}\text{N}$ - Aβ40, all from Aβ 100 ng/L solutions.

## 2.7 APP Variants

**Supplemental Table 7.** Published variants in A $\beta$ 42 region, phenotype (if reported), relevant disease (i.e., AD, cerebral amyloid angiopathy [CAA] and/or Parkinson's Disease Dementia [PDD]) and the global population frequency from Database searches (Genome Aggregation Database (GnomAD- Exomes), Trans-Omics for Precision Medicine (TOPMed), Exome Aggregation Consortium (ExAC), and the NHLBI GO Exome Sequencing Project (GO-ESP) Exome Variant Server.

| Variant                | Phenotype  | Disease Relevance | Frequency     |         |         |         | Average Frequency |
|------------------------|------------|-------------------|---------------|---------|---------|---------|-------------------|
|                        |            |                   | GnomAD-Exomes | TOPMED  | ExAC    | GO-ESP  |                   |
| <b>Icelandic (A2T)</b> | Protective | AD                | 4.6E-04       | 1.1E-04 | 4.7E-04 | 1.0E-04 | 4.6E-04           |
| <b>A2V</b>             | Pathogenic | AD                |               |         |         |         |                   |
| <b>E3Q</b>             | Unknown    |                   | 4.0E-05       | 2.0E-05 | 1.0E-05 |         | 2.3E-05           |
| <b>E3K</b>             | Unknown    |                   | 4.0E-05       | 2.0E-05 | 1.0E-05 |         | 2.3E-05           |
| <b>F4I</b>             | Unknown    |                   |               |         | 1.0E-05 |         | 1.0E-05           |
| <b>R5Q</b>             | Unknown    |                   | 2.0E-05       | 3.0E-05 | 4.0E-05 |         | 3.0E-05           |
| <b>English (H6R)</b>   | Pathogenic | AD                | 1.0E-05       |         |         |         | 1.0E-05           |
| <b>Taiwanese (D7H)</b> | Pathogenic | AD                |               |         |         |         |                   |
| <b>Tottori (D7N)</b>   | Pathogenic | AD                |               |         |         |         |                   |
| <b>D7E</b>             | Unknown    |                   |               | 1.0E-05 |         |         | 1.0E-05           |
| <b>G9A</b>             | Unknown    |                   |               | 1.0E-05 | 1.0E-05 | 1.0E-04 | 4.0E-05           |
| <b>G9V</b>             | Unknown    |                   |               | 1.0E-05 | 1.0E-05 | 1.0E-04 | 4.0E-05           |
| <b>G9E</b>             | Unknown    |                   |               | 1.0E-05 | 1.0E-05 | 1.0E-04 | 4.0E-05           |
| <b>Leuven (E11K)</b>   | Pathogenic | AD                |               |         |         |         |                   |
| <b>V12I</b>            | Unknown    |                   | 1.0E-05       | 6.0E-05 | 2.0E-05 |         | 3.0E-05           |
| <b>H13P</b>            | Unknown    |                   |               |         |         |         |                   |
| <b>H14R</b>            | Unknown    |                   |               | 1.0E-05 | 1.0E-05 |         | 1.0E-05           |
| <b>Q15E</b>            | Unknown    |                   |               | 1.0E-05 |         |         | 1.0E-05           |
| <b>K16N</b>            | Pathogenic | AD                |               |         |         |         |                   |



|                        |                     |          |         |         |         |         |         |
|------------------------|---------------------|----------|---------|---------|---------|---------|---------|
| <b>V18M</b>            | Unknown             |          | 1.0E-05 | 1.0E-05 | 2.0E-05 |         | 1.3E-05 |
| <b>F19L</b>            | Unknown             |          |         |         |         |         |         |
| <b>Flemish (A21G)</b>  | Pathogenic (AD)     | AD & CAA |         |         |         |         |         |
| <b>E22D</b>            | Unknown             |          |         |         | 1.0E-05 |         | 1.0E-05 |
| <b>Osaka (E22Δ)</b>    | Pathogenic          | AD       |         |         |         |         |         |
| <b>Arctic (E22G)</b>   | Pathogenic (AD)     | AD & CAA |         |         |         |         |         |
| <b>Dutch (E22Q)</b>    | Pathogenic          | CAA      |         |         |         |         |         |
| <b>Italian (E22K)</b>  | Pathogenic          | CAA      |         |         |         |         |         |
| <b>Iowa (D23N)</b>     | Pathogenic          | AD & CAA |         |         |         |         |         |
| <b>V24G</b>            | Unknown             |          |         | 2.0E-05 |         |         | 2.0E-05 |
| <b>V24A</b>            | Unknown             |          |         | 2.0E-05 |         |         | 2.0E-05 |
| <b>G25D</b>            | Unknown             |          |         |         |         |         |         |
| <b>K28R</b>            | Unknown             |          | 1.0E-05 |         |         |         | 1.0E-05 |
| <b>I31V</b>            | Unknown             |          |         | 2.0E-05 | 1.0E-05 |         | 1.5E-05 |
| <b>I32V</b>            | Unknown             |          | 1.0E-05 |         | 1.0E-05 |         | 1.0E-05 |
| <b>Piedmont (L34V)</b> | Pathogenic          | CAA      |         |         |         |         |         |
| <b>V36M</b>            | Unknown             |          |         |         | 1.0E-05 |         | 1.0E-05 |
| <b>G38C</b>            | Unknown             |          |         |         | 8.2E-06 |         | 8.2E-06 |
| <b>G38S</b>            | Not Pathogenic (AD) | PDD      |         |         | 4.1E-05 |         | 4.1E-05 |
| <b>G38V</b>            | Unknown             |          |         |         | 1.0E-05 |         | 1.0E-05 |
| <b>V39I</b>            | Unknown             |          | 2.0E-05 |         | 3.3E-05 | 1.0E-04 | 5.1E-05 |
| <b>I41V</b>            | Unknown             |          |         |         |         |         |         |
| <b>A42T</b>            | Unknown             | AD       | 1.0E-04 | 3.0E-05 | 5.8E-05 |         | 6.3E-05 |
| <b>A42V</b>            | Not Pathogenic (AD) |          | 4.0E-05 | 2.0E-05 | 6.6E-06 |         | 4.2E-05 |

**Supplemental Table 8.** MRM transitions of wt-A $\beta$  peptides and var-A $\beta$  peptides meeting the selection criteria in the multiplex HPLC-MS/MS method.

| <b>Peptides</b>                                           | <b>Precursor ion (m/z)</b> | <b>Product ions (m/z)</b> |
|-----------------------------------------------------------|----------------------------|---------------------------|
| wt-A $\beta$ 40                                           | 1083.0                     | 1054.1, 1029.1, 1000.8    |
| wt-A $\beta$ 42                                           | 1129.4                     | 1107.1, 1078.6, 1053.8    |
| <sup>15</sup> N-IS-A $\beta$ 40                           | 1096.0                     | 1066.9                    |
| <sup>15</sup> N-IS-A $\beta$ 42                           | 1143.0                     | 1092.1                    |
| E22K-, D7N-, E22Q-, D23N-, E11K-A $\beta$ 40 <sup>a</sup> | 1083.0                     | 1054.1, 1029.1, 1000.8    |
| H6R-A $\beta$ 40                                          | 1088.2                     | 1058.9, 1033.9, 1005.4    |
| L34V-, A21G-, K16N-A $\beta$ 40                           | 1079.9                     | 1050.5, 1025.8, 997.4     |
| E22G-A $\beta$ 40                                         | 1065.5                     | 1036.2, 1011.5, 997.1     |
| E22 $\Delta$ -A $\beta$ 40                                | 1051.2                     | 943.9, 914.8, 882.7       |
| A2V-A $\beta$ 40                                          | 1090.4                     | 1054.1, 1029.1, 1000.8    |
| D7H-A $\beta$ 40                                          | 1089.0                     | 1054.1, 1029.1, 948       |
| G9A-A $\beta$ 40                                          | 1087.0                     | 1050.5, 1029.1, 943.9     |
| G9V-A $\beta$ 40                                          | 1093.3                     | 1054.1, 1029.1, 943.5     |
| G9E-A $\beta$ 40                                          | 1101.5                     | 1054.1, 1029.1, 1025.8    |
| G38S-A $\beta$ 40                                         | 1090.9                     | 1054.1, 1029.1, 1000.8    |
| V39I-A $\beta$ 40                                         | 1087.0                     | 1029.1, 1025.8, 1000.8    |
| A42T-A $\beta$ 42                                         | 1137.0                     | 1107.1, 1078.6, 1053.8    |
| A42V-A $\beta$ 42                                         | 1136.5                     | 1107.1, 1078.6, 1053.8    |

<sup>a</sup> Variants separated chromatographically from wt-A $\beta$ 40
